# Supplementary material for: Flower-like tungsten-doped Fe–Co phosphides as efficient electrocatalysts for the hydrogen evolution reaction
Source: Royal Society of Chemistry journal article supplement (doi:10.1039/d1ce00426c), 2021-01-01
Supplement: d1ce00426c1.pdf [file d1ce00426c1.pdf]

## Supporting Information

### **Flower-like tungsten-doped Fe–Co phosphides as efficient electrocatalysts for hydrogen evolution reaction**

Qian Zhang,<sup>a,b</sup> Shuihua Tang,<sup>a,b,\*</sup> Lieha Shen,<sup>a,b</sup> Weixiang Yang,<sup>a,b</sup> Zhen Tang,<sup>a,b</sup> and Limei Yu<sup>a,b</sup>

a State Key Lab of Oil and Gas Reservoir Geology & Exploitation, Southwest Petroleum University, Chengdu 610500, P R China.

b School of New Energy and Materials, Southwest Petroleum University, Chengdu 610500, P R China.

\* This is the corresponding author. Tel/Fax: +86-2883032879, E-mail: [spraytang@hotmail.com](mailto:spraytang@hotmail.com)

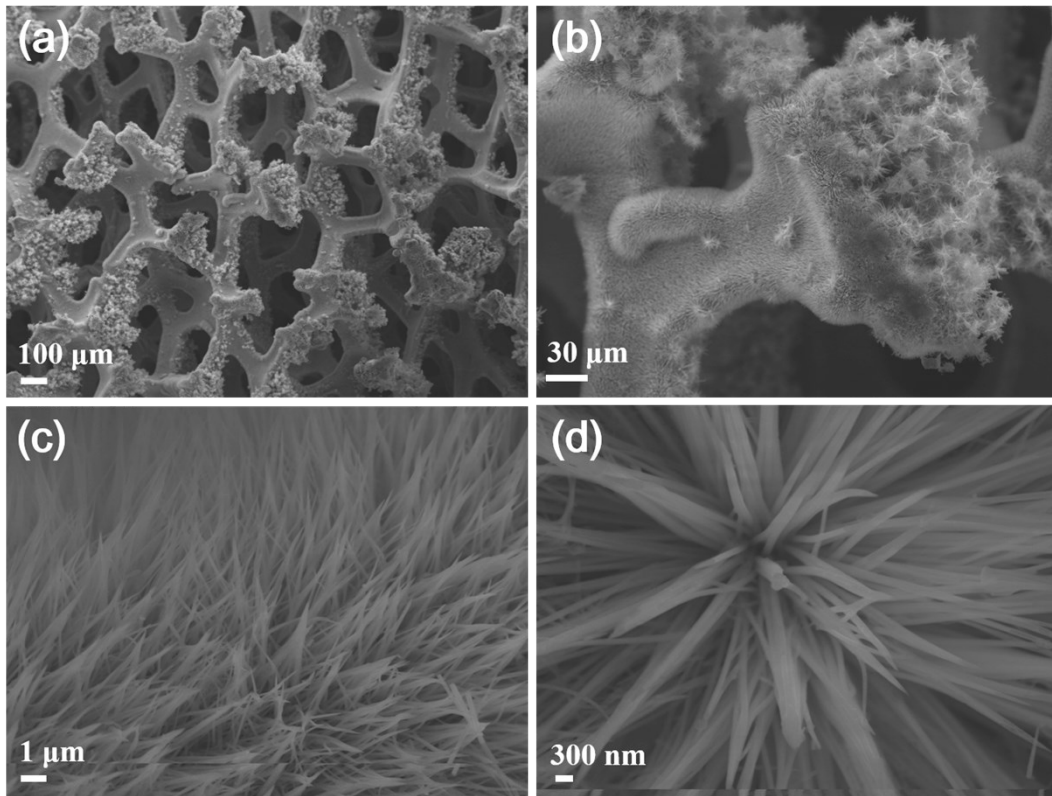

Fig. S1 SEM images of the FeCoP/NF electrode.

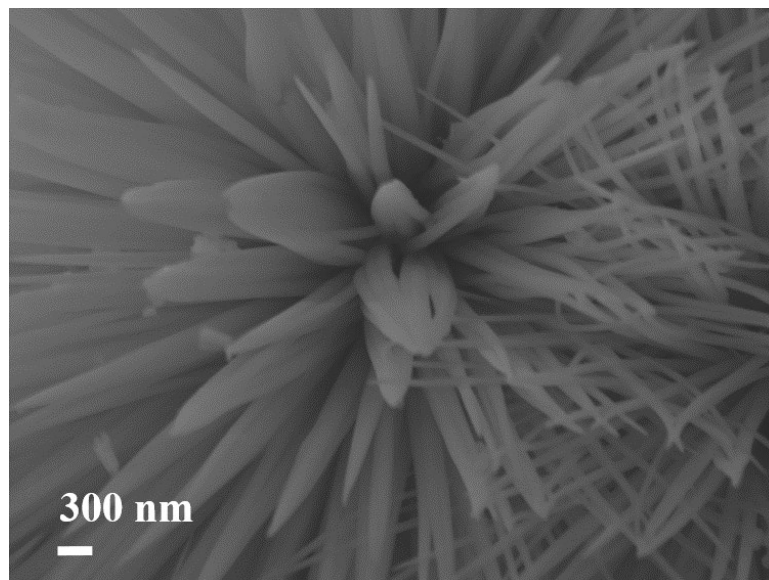

Fig. S2 SEM image of the W-FeCoP/NF electrode.

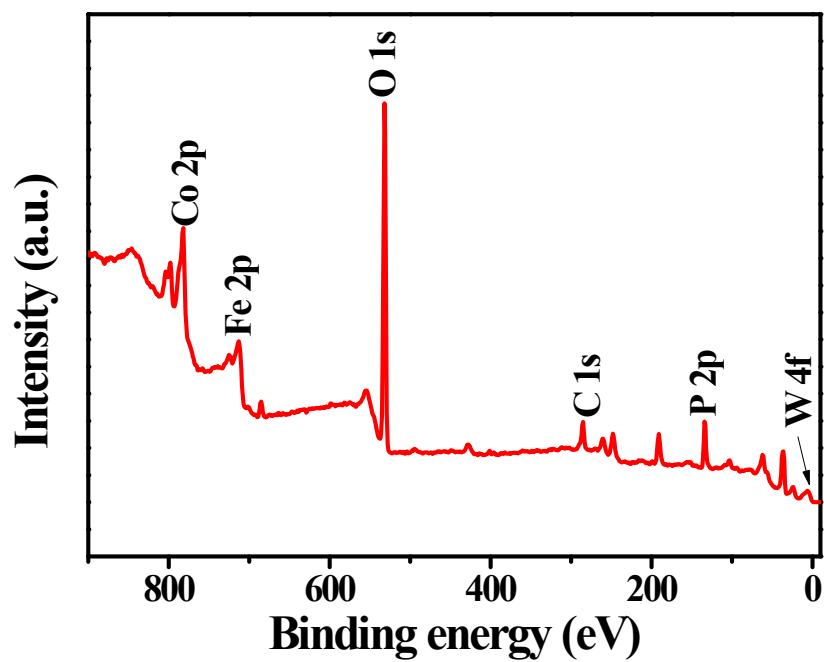

Fig. S3 Survey XPS spectrum of the W-FeCoP/NF electrode.

Table S1 The elemental contents of Fe, Co, P and W from XPS.

| Name  | Atomic % |
|-------|----------|
| Fe 2p | 14.6     |
| Co 2p | 35.8     |
| P 2p  | 46.2     |
| W 4f  | 3.4      |

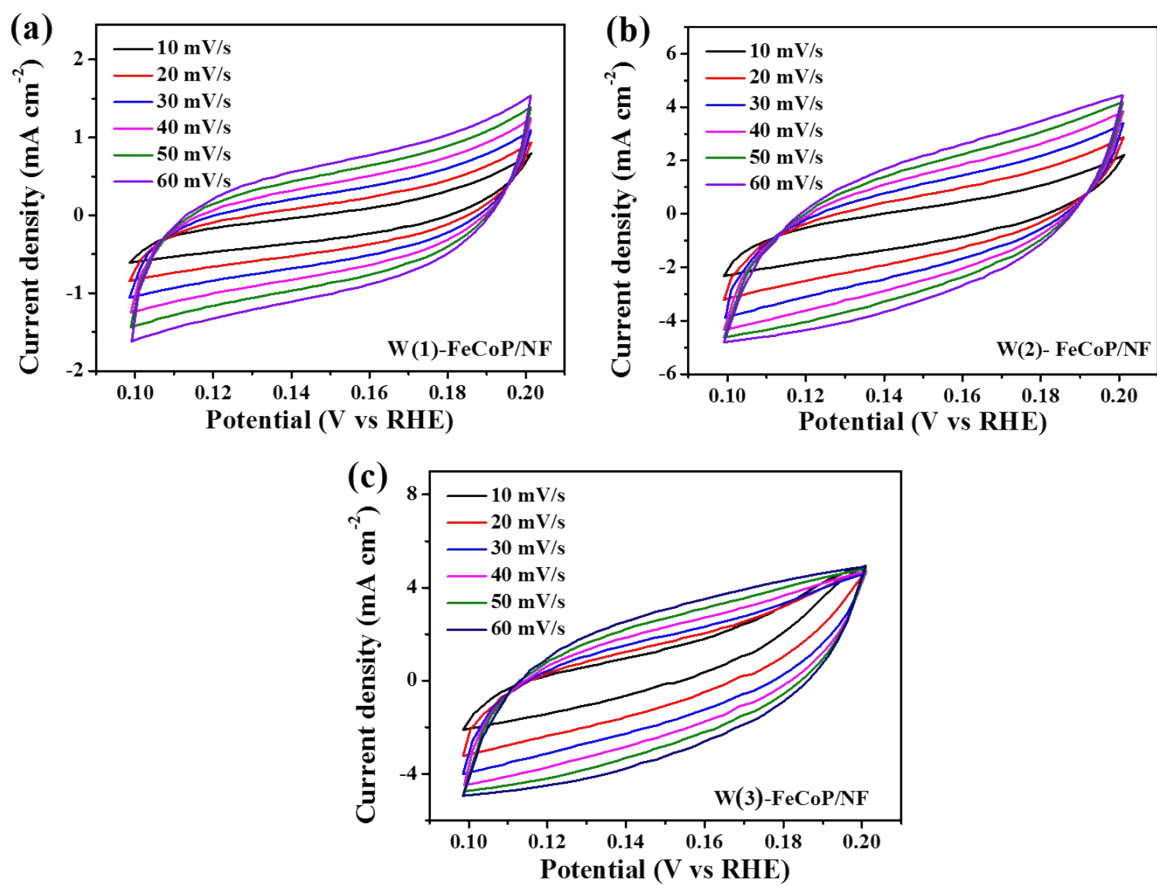

Fig. S4 CV cycles at different scan rates of (a)W(1)-FeCoP/NF, (b) W(2)-FeCoP/NF and (c) W(3)-FeCoP/NF.

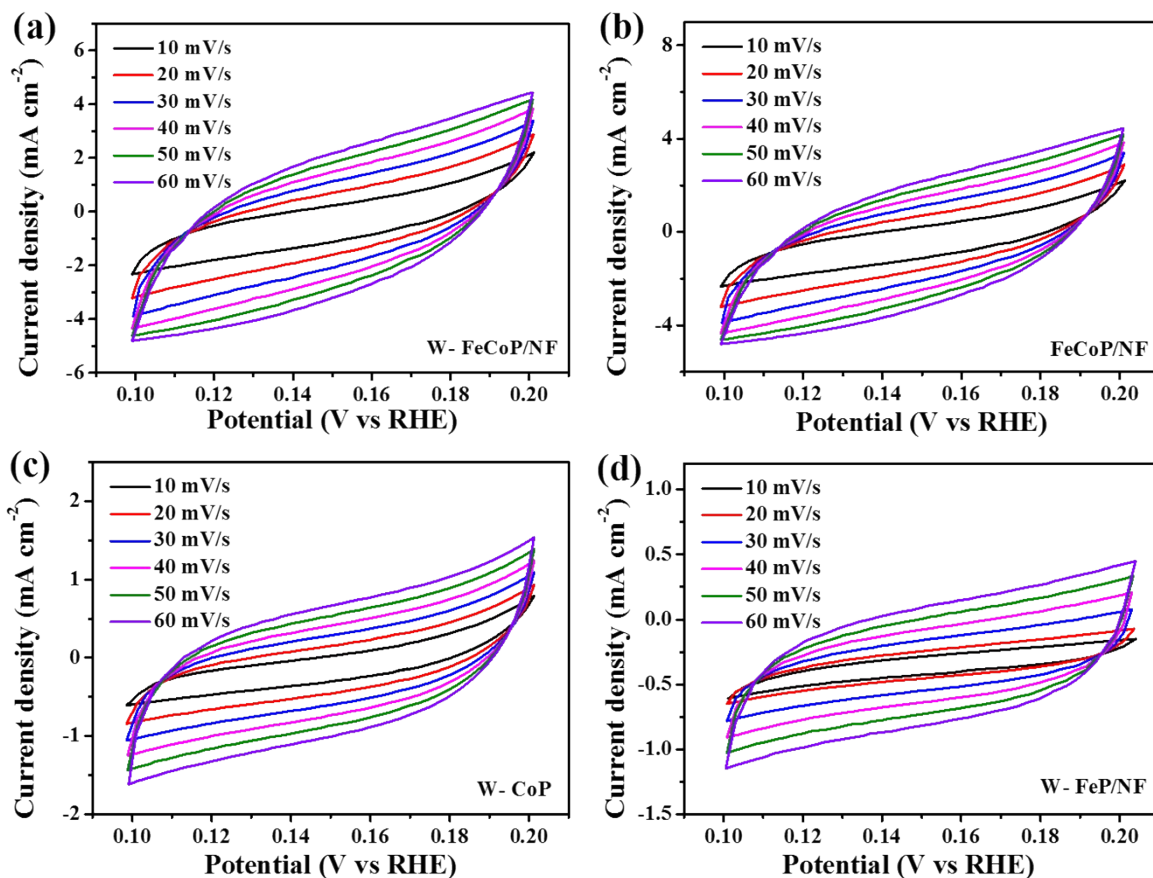

Fig. S5 CV cycles at different scan rates of (a) W-FeCoP/NF, (b) FeCoP/NF, (c) W-CoP/NF and (d) W-FeP/NF.

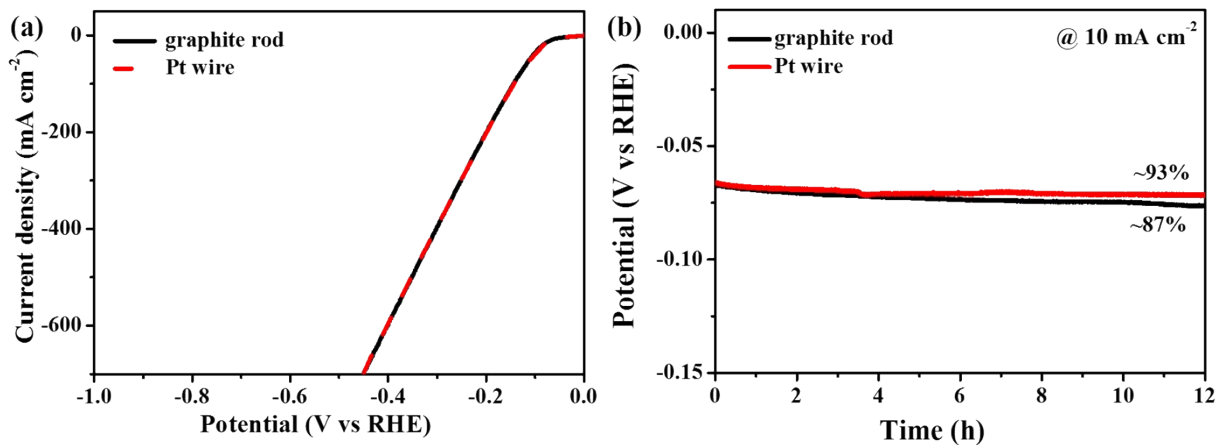

Fig. S6 HER performance of W-FeCoP/NF tested by different counter electrodes of graphite rod and Pt wire. (a) LSV curves; (b) Stability curves.
